# Supplementary material for: 2D end-to-end carbon nanotube conductive networks in polymer nanocomposites: a conceptual design to dramatically enhance the sensitivities of strain sensors
Source: Royal Society of Chemistry journal article supplement (doi:10.1039/c7nr08077h), 2017-12-19
Supplement: c7nr08077h1.pdf [file c7nr08077h1.pdf]

Electronic Supplementary Information for

**2D End-to-end Carbon Nanotube Conductive Networks in Polymer Nanocomposites:  
A Conceptual Design to Dramatically Enhance Sensitivities of Strain Sensors**

*Jun-Hong Pu,<sup>1</sup> Xiang-Jun Zha,<sup>1</sup> Min Zhao,<sup>2</sup> Shengyao Li,<sup>2</sup> Rui-Ying Bao,<sup>1</sup>*

*Zheng-Ying Liu,<sup>1</sup> Bang-Hu Xie,<sup>1</sup> Ming-Bo Yang,<sup>1</sup> Zhanhu Guo,<sup>2,\*</sup> Wei Yang<sup>1,\*</sup>*

<sup>1</sup>*College of Polymer Science and Engineering, Sichuan University, State Key Laboratory of Polymer Materials Engineering, Chengdu, 610065, Sichuan, People's Republic of China.*

<sup>2</sup>*Integrated Composites Laboratory (ICL), Department of Chemical & Biomolecular Engineering, University of Tennessee, Knoxville, TN 37996 USA*

*E-mail address: [weiyang@scu.edu.cn](mailto:weiyang@scu.edu.cn) (W. Yang) or [zguo10@utk.edu](mailto:zguo10@utk.edu) (Z. Guo)*

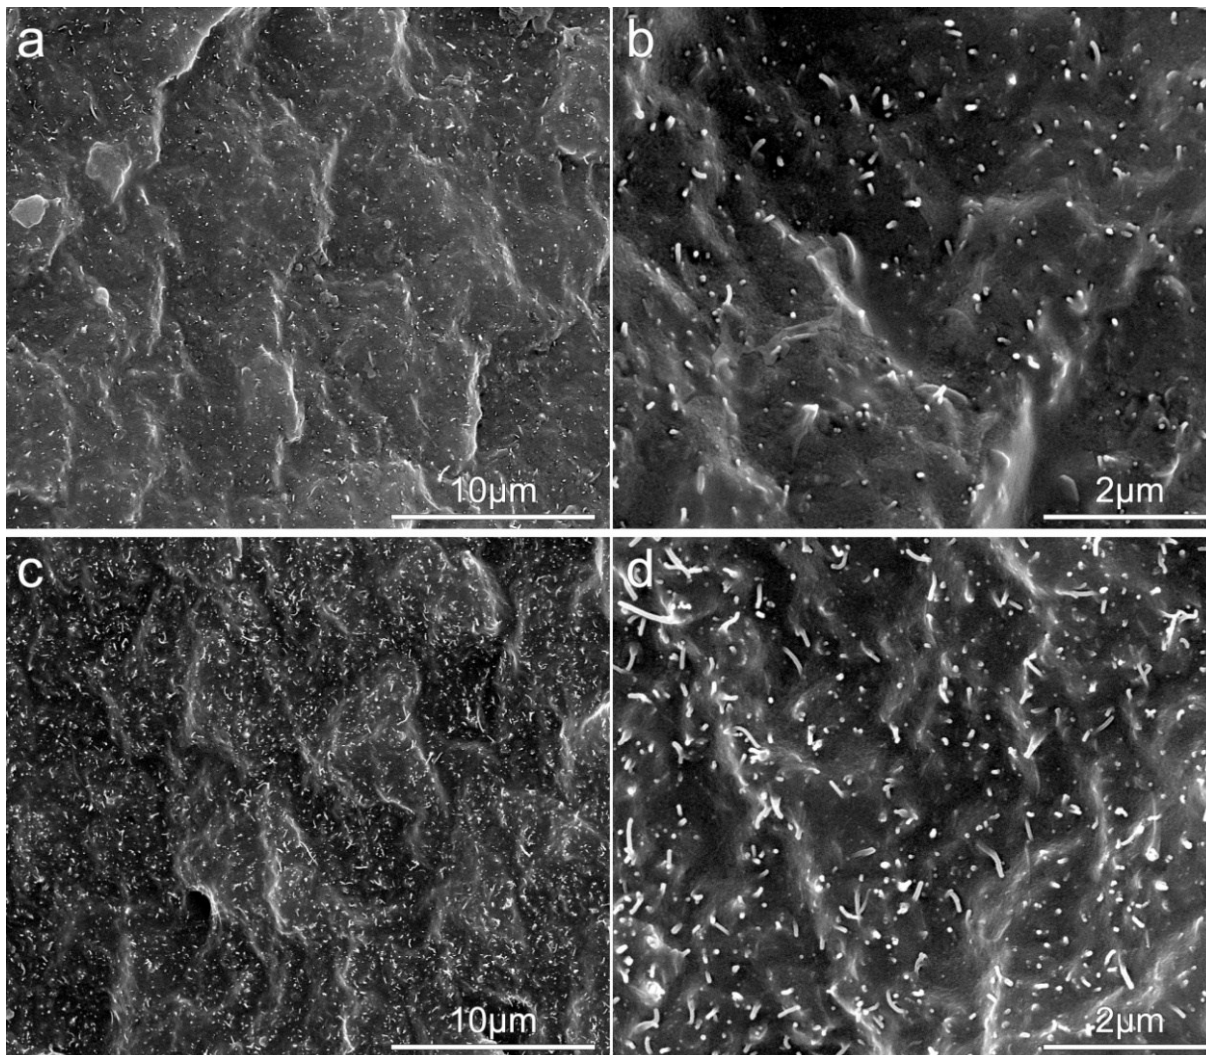

**Fig. S1.** SEM images of MWCNT-OBC nanocomposites with a MWCNT content of **a,b)** 7.61 vol%, and **c,d)** 8.96%.

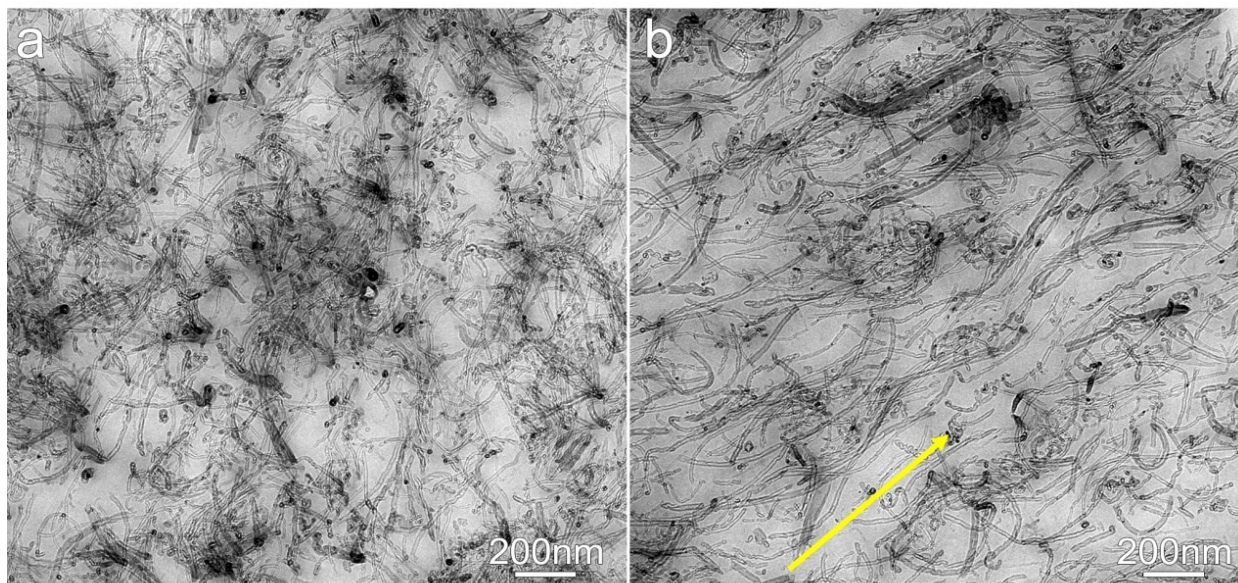

**Fig. S2.** TEM images of MWCNT-OBC nanocomposites with a MWCNT content of 8.96 vol% (a) without and (b) with aligned MWCNT structures.

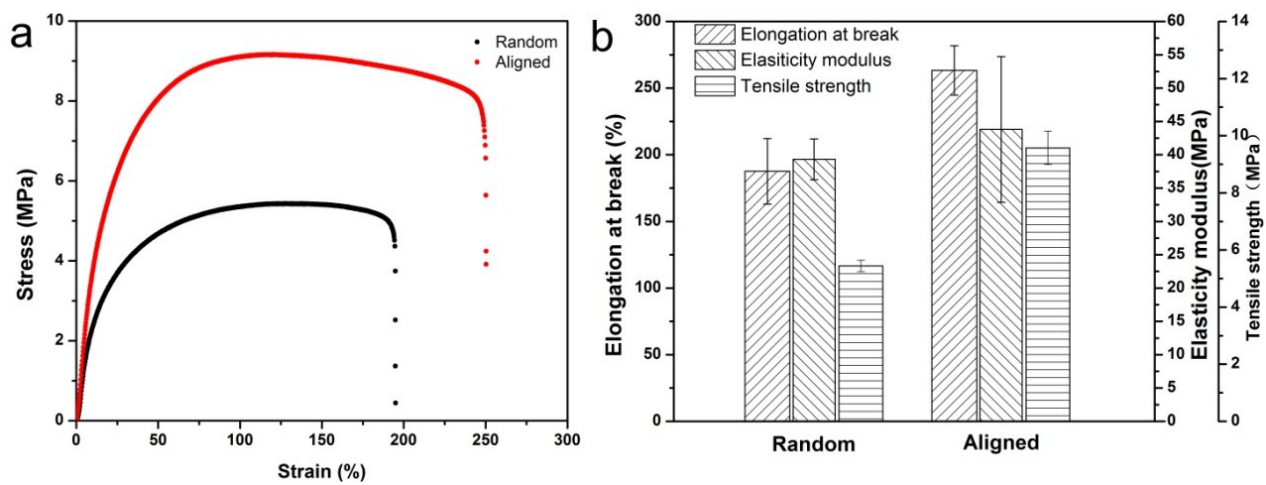

**Fig. S3.** (a) Stress-strain curves; and (b) the elongation at break, elasticity modulus and tensile strength of R-7.61 and A-7.61.



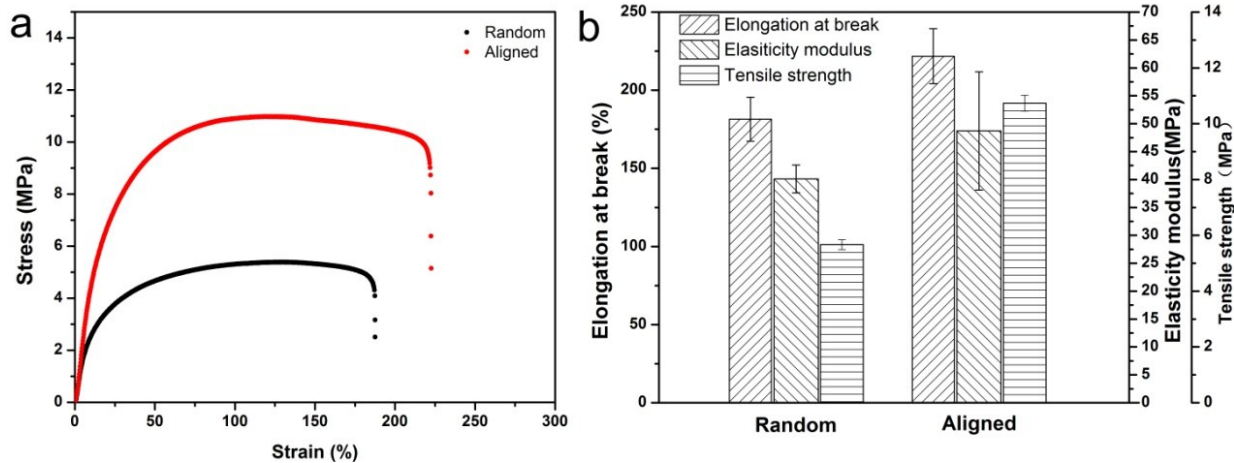

**Fig. S4.** (a) Stress-strain curves and (b) the elongation at break, elasticity modulus and tensile strength of R-8.96 and A-8.96

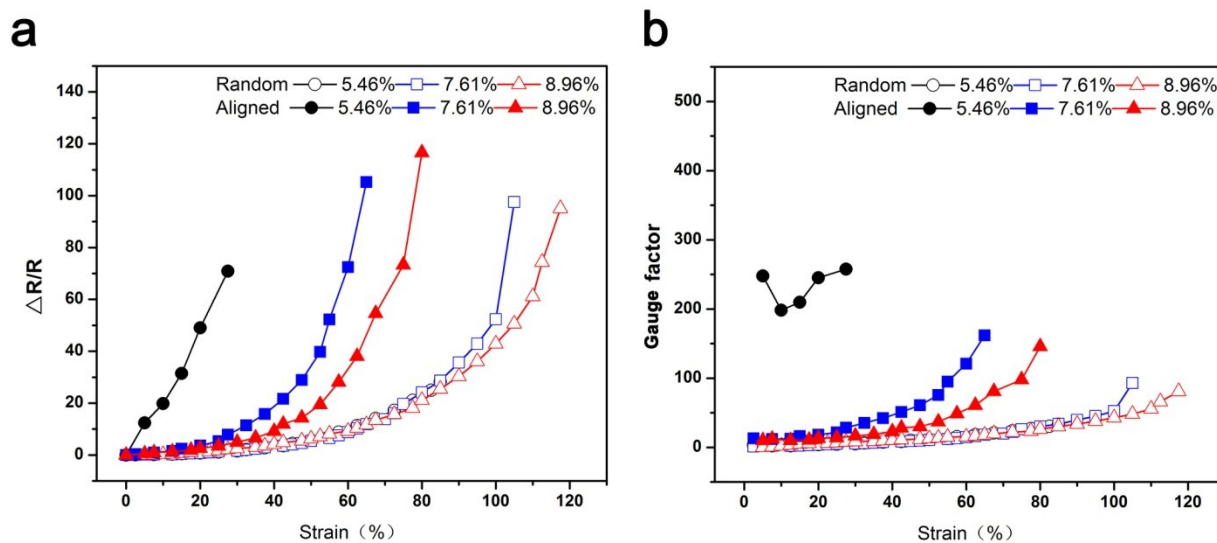

**Fig. S5.** a) Relative resistance change of the MWCNT-OBC nanocomposites with different MWCNT contents versus the applied strain; and b) Gauge factors of the MWCNT-OBC nanocomposites with different MWCNT contents versus the applied strain.

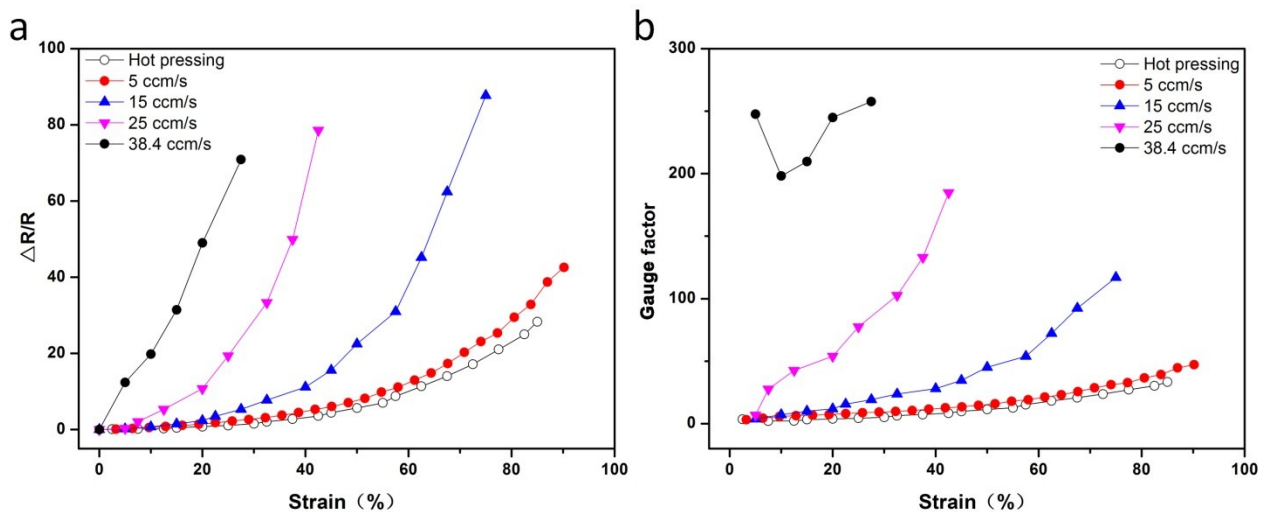

**Fig. S6** Strain sensing characterizations. **a)** Relative change in electrical resistance of 5.46 vol% composites prepared with different injection speeds versus the applied strain; and **b)** GFs of 5.46 vol% composites prepared with different injection speeds versus the applied strain.

**Table S1.** R values for MWCNT-OBC nanocomposites with different contents of MWCNT.

| CNT content<br>[vol%] | R<br>[random] | R<br>[aligned] |
|-----------------------|---------------|----------------|
| 5.46                  | 1.01          | 1.40           |
| 7.61                  | 0.96          | 1.61           |
| 8.96                  | 1.06          | 1.88           |

**Table S2.** Summary of the performance of recently reported flexible and stretchable strain sensors based on elastomer-CNTs.

| Materials    | Sensing mechanisms | Durability | Flexibility/<br>Stretchability | Sensitivity (GF) at<br>5% strain | Linearity        | Ref       |
|--------------|--------------------|------------|--------------------------------|----------------------------------|------------------|-----------|
| OBC-CNT      | piezoresistance    | Yes        | Stretchable<br>[300%]          | 248                              | linear           | This work |
| Ecoflex-CNT  | piezoresistance    | Yes        | Stretchable<br>[1380%]         | <2.5                             | linear           | 25        |
| PDMS-CNT     | piezoresistance    | Yes        | Stretchable<br>[280%]          | 0.82                             | 2 linear regions | 22        |
| Ecoflex-CNT  | piezoresistance    | Yes        | Stretchable<br>[900%]          | 0.4                              | Nonlinear        | 28        |
| PDMS-CNT     | piezoresistance    | not proven | Flexiable<br>[15%]             | 0.2                              | Nonlinear        | 10        |
| PU-CNT       | piezoresistance    | Yes        | Stretchable<br>[400%]          | 4                                | Nonlinear        | 29        |
| TPU-CNT-CB   | piezoresistance    | Yes        | Stretchable<br>[200%]          | 5                                | Nonlinear        | 31        |
| PDMS-CNT     | piezoresistance    | Yes        | Stretchable<br>[200%]          | -                                | Unavailable      | 51        |
| Ecoflex-CNT  | capacitance        | Yes        | Stretchable<br>[150%]          | 0.5                              | linear           | 52        |
| Silicone-CNT | capacitance        | Yes        | Stretchable<br>[100%]          | 0.99                             | linear           | 53        |
| PDMS-CNT     | capacitance        | Yes        | Stretchable<br>[300%]          | 1                                | linear           | 11        |

### Notes and references

- Y. J. Jung, S. Kar, S. Talapatra, C. Soldano, G. Viswanathan, X. S. Li, Z. L. Yao, F. S. Ou, A. Avadhanula, R. Vajtai, S. Curran, O. Nalamasu and P. M. Ajayan, *Nano Lett*, 2006, 6, 413-418

11. L. Cai, L. Song, P. S. Luan, Q. Zhang, N. Zhang, Q. Q. Gao, D. Zhao, X. Zhang, M. Tu, F. Yang, W. B. Zhou, Q. X. Fan, J. Luo, W. Y. Zhou, P. M. Ajayan and S. S. Xie, *Sci. Rep.*, 2013, **3**, 8.
22. T. Yamada, Y. Hayamizu, Y. Yamamoto, Y. Yomogida, A. Izadi-Najafabadi, D. N. Futaba and K. Hata, *Nat. Nanotechnol.*, 2011, **6**, 296-301.
25. M. Amjadi, Y. J. Yoon and I. Park, *Nanotechnology*, 2015, **26**, 11.
28. S. Ryu, P. Lee, J. B. Chou, R. Xu, R. Zhao, A. J. Hart and S.-G. Kim, *ACS nano*, 2015, **9**, 5929-5936.
29. H. Zhu, X. Wang, J. Liang, H. Lv, H. Tong, L. Ma, Y. Hu, G. Zhu, T. Zhang and Z. Tie, *Adv. Funct. Mater.*, 2017, **27**.
31. L. Lin, S. Liu, Q. Zhang, X. Li, M. Ji, H. Deng and Q. Fu, *ACS Appl. Mater. Interfaces*, 2013, **5**, 5815-5824.
51. U.-H. Shin, D.-W. Jeong, S.-M. Park, S.-H. Kim, H. W. Lee and J.-M. Kim, *Carbon*, 2014, **80**, 396-404.
52. P. Slobodian, P. Riha and P. Saha, *Carbon*, 2012, **50**, 3446-3453.
53. D. J. Cohen, D. Mitra, K. Peterson and M. M. Maharbiz, *Nano letts*, 2012, **12**, 1821-1825.
